# Supplementary material for: A Modular Analysis of the Auxin Signalling Network
Source: PubMed Central journal article supplement (PMC4373724; doi:10.1371/journal.pone.0122231), 2015-03-25
Supplement: pone.0122231.s001.pdf [file pone.0122231.s001.pdf]

# A modular analysis of the auxin signalling network

## Supplementary Information

E. Farcot, C. Lavedrine, T. Vernoux

### Response speed-up by homodimerization

To get some analytical insight into the potential role of IAA:IAA dimer formation, we consider the sole IAA dynamics, and compare the cases when homodimers form or not. In equations, we consider the populations of monomers  $I$  and dimers  $D_{II}$ :

$$\frac{dI}{dt} = \pi_I \delta + \theta D_{II} - \alpha I^2 - \delta I, \quad \frac{dD_{II}}{dt} = \alpha I^2 - \theta D_{II} - \delta_{II} D_{II}.$$

The choice of a production rate written as  $\pi_I \delta$  is designed to ensure that the (unique) equilibrium found in absence of homodimerization is equal to the single parameter  $\pi_I$ .

Assuming for simplicity that the dimers are at equilibrium (as would occur for instance with large  $\alpha, \theta$ ), we find:

$$D_{II} = \frac{\alpha}{\theta + \delta_{II}} I^2 \quad \text{and} \quad \theta D_{II} - \alpha I^2 = -\delta_{II} D_{II} = \frac{-\delta_{II} \alpha}{\theta + \delta_{II}} I^2.$$

Using these relations gives a unique simplified ODE:

$$\frac{dI}{dt} = \delta(\pi_I - I) - \gamma I^2, \quad \text{where} \quad \gamma = \frac{\delta_{II} \alpha}{\theta + \delta_{II}}.$$

Two steady states are found by solving a quadratic equation, one of which is positive:

$$I^* = \frac{-\delta + \sqrt{\delta^2 + 4\delta\gamma\pi_I}}{2\gamma}. \quad (1)$$

This steady state  $I^*$  is always smaller than the value  $\pi_I$  found for  $\gamma = 0$ :

$$\pi_I - I^* = \frac{2\pi_I\gamma + \delta - \sqrt{\delta^2 + 4\delta\gamma\pi_I}}{2\gamma} > \frac{2\pi_I\gamma + \delta - \sqrt{(\delta + 2\gamma\pi_I)^2}}{2\gamma} = 0.$$

Moreover, it can be shown by differentiating  $I^*$  that it decreases as a function of  $\gamma$ :

$$\frac{\partial I^*}{\partial \gamma} = \frac{\delta \left( \sqrt{\delta^2 + 4\gamma\delta\pi_I} - \delta - 2\gamma\pi_I \right)}{2\gamma^2 \sqrt{\delta^2 + 4\gamma\delta\pi_I}} < \frac{\delta \left( \sqrt{(\delta + 2\gamma\pi_I)^2} - \delta - 2\gamma\pi_I \right)}{2\gamma^2 \sqrt{\delta^2 + 4\gamma\delta\pi_I}} = 0.$$

So, the steady state value is maximal without homodimerization and decreases as the latter becomes more prominent.

As we proceed to assess the influence of  $\gamma$  on the response time of the system, we rescale the production rate of  $I$  to ensure that steady state value is always 1 regardless of  $\gamma$ , i.e. we seek  $\tilde{\pi}_I$  such that

$$\frac{-\delta + \sqrt{\delta^2 + 4\delta\gamma\tilde{\pi}_I}}{2\gamma} = 1 \iff \tilde{\pi}_I = 1 + \frac{\gamma}{\delta}.$$

Note that in the limit  $\gamma \rightarrow 0$  this gives  $\tilde{\pi}_I = 1$  as expected. So, we are now considering the rescaled system

$$\frac{dI}{dt} = (\gamma + \delta) - \delta I - \gamma I^2. \quad (2)$$

Let us fix  $I(0) = 0$  for simplicity in the following. For this initial condition, it is possible to derive a closed form solution for Equation (2)<sup>1</sup>:

$$I(t) = \frac{(\gamma + \delta)(1 - e^{-(\delta+2\gamma)t})}{\gamma + \delta + \gamma e^{-(\delta+2\gamma)t}}. \quad (3)$$

Using this closed form solution, it is also possible to compute the time taken to reach a given percentage  $0 < \rho < 1$  of the equilibrium, i.e. the non-negative time  $\tau_\rho$  such that the solution  $I(t)$  to the equation above with  $I(0) = 0$  verifies:

$$I(\tau_\rho) = \rho.$$

Then, a direct calculation gives

$$\tau_\rho = \frac{1}{\delta + 2\gamma} \log \left( 1 + \frac{\rho(\delta + 2\gamma)}{(1 - \rho)(\gamma + \delta)} \right), \quad (4)$$

which takes the value  $\frac{1}{\delta} \log \left( \frac{1}{1 - \rho} \right)$  when  $\gamma = 0$ . One can show in fact that this limit is an upper bound and  $\tau_\rho$  decreases with  $\gamma$  for any value of  $\rho$  (see below). From the expression above, one can also verify that  $\lim_{\gamma \rightarrow \infty} \tau = 0$ .

**Proof that  $\tau_\rho$  decreases as a function of  $\gamma$ .**

We compute explicitly its partial derivative of  $\tau_\rho$ , Equation (4), with respect to  $\gamma$ :

$$\frac{\partial \tau_\rho}{\partial \gamma} = \frac{2}{(2\gamma + \delta)^2} \log \left( 1 - \frac{\rho(2\gamma + \delta)}{(1 + \rho)\gamma + \delta} \right) + \frac{\rho\delta}{(2\gamma + \delta)(\gamma + \delta)((1 + \rho)\gamma + \delta)}$$

which has the same sign as

$$\frac{(2\gamma + \delta)^2}{2} \frac{\partial \tau_\rho}{\partial \gamma} = \log \left( 1 - \frac{\rho(2\gamma + \delta)}{(1 + \rho)\gamma + \delta} \right) + \frac{\rho\delta(2\gamma + \delta)}{2(\gamma + \delta)((1 + \rho)\gamma + \delta)}.$$

Then, from  $\log(1 - x) < -x$  for all  $0 < x < 1$  we find

$$\begin{aligned} \frac{(2\gamma + \delta)^2}{2} \frac{\partial \tau_\rho}{\partial \gamma} &< -\frac{\rho(2\gamma + \delta)}{(1 + \rho)\gamma + \delta} + \frac{\rho\delta(2\gamma + \delta)}{2(\gamma + \delta)((1 + \rho)\gamma + \delta)} \\ &= \frac{\rho(2\gamma + \delta)}{(1 + \rho)\gamma + \delta} \left( -1 + \frac{\delta}{2(\gamma + \delta)} \right) \\ &= \frac{\rho(2\gamma + \delta)}{(1 + \rho)\gamma + \delta} \cdot \frac{-(2\gamma + \delta)}{\gamma + \delta}. \end{aligned}$$

And thus  $\frac{\partial \tau_\rho}{\partial \gamma} < \frac{-2\rho}{((1 + \rho)\gamma + \delta)(\gamma + \delta)} < 0$ . □

## Positive feedback and bistability

As discussed in the main text we implemented feedback on ARF+ as follows

- the production rate if  $I$  is a constant  $\pi_I$ ,
- $\pi_A$  is replaced by  $\pi_A R$ .

---

<sup>1</sup>Calculated with the aid of sage, see <http://www.sagemath.org/>

Furthermore, we considered a specific parameter regime for the main ODE system, which made some analytic calculations feasible. Namely, we supposed the following:

- the formation of all dimers and promoter-protein complexes are supposed at steady state
- ARF:ARF dimers form at a negligible rate, i.e.  $\alpha_{AA} \approx 0$  and  $\alpha_{AG_A} \approx 0$ .

Under these assumptions, only the three variables  $A$ ,  $I$  and  $R$  are non-steady, and straightforward calculations show that their dynamics follow an ODE system of the form

$$\frac{dI}{dt} = \pi_I - \gamma_{AI}^+(x)IA - \gamma_{II}(x)I^2 - \delta_I(x)I \quad (5)$$

$$\frac{dA}{dt} = \pi_A R - \gamma_{AI}^-(x)IA - \delta_A A \quad (6)$$

$$\frac{dR}{dt} = \frac{\omega_0 A}{1 + \omega_1 A + \omega_2 AI} - \delta_R R, \quad (7)$$

where

$$\omega_0 = \frac{h_A \alpha_{AG}}{\theta_{AG}}, \quad \omega_1 = \frac{\alpha_{AG}}{\theta_{AG}}, \quad \omega_2 = \frac{\alpha_{AG} \alpha_{GAI}}{\theta_{AG} \theta_{GAI}},$$

and

$$\begin{aligned} \gamma_{II}(x) &= \frac{-\delta_{II}(2 + \kappa_x x) \alpha_{II}}{\theta_{II} + \delta_{II}(1 + \kappa_x x)} \\ \gamma_{AI}^+(x) &= \frac{-\delta_{AI} \alpha_{AI}}{\theta_{AI} + \delta_{AI}(1 + \kappa_x x)} \\ \gamma_{AI}^-(x) &= \frac{-\delta_{AI} \alpha_{AI}(1 + \kappa_x x)}{\theta_{AI} + \delta_{AI}(1 + \kappa_x x)}. \end{aligned}$$

To consider the possible occurrence of multiple stable equilibria, let us compute the steady state equations of this system. Firstly,

$$A = \frac{\pi_A R}{\delta_A + \gamma_{AI}^-(x)I}$$

and this can be injected in the last equation to give

$$\delta_R \pi_A (\omega_1 + \omega_2 I) R^2 + (\delta_A + \gamma_{AI}^-(x)I - \omega_0 \pi_A) R = 0,$$

in other words  $R \in \left\{ 0, \frac{\omega_0 \pi_A - \delta_A - \gamma_{AI}^-(x)I}{\delta_R \pi_A (\omega_1 + \omega_2 I)} \right\}$  are two steady state solutions for (7). If there exists a steady state solution  $I$  to (5) such that the nonzero steady state  $R$  is positive, the system (5)-(7) is bistable.

As performing these computations analytically is not feasible, we simulated numerically solutions of (5)-(7) for various parameters, using the formulas above as a guide for intuition. We found some cases where bistability was occurring, see Figure 10.
