# Supplementary material for: A Modular Analysis of the Auxin Signalling Network
Source: PubMed Central journal article supplement (PMC4373724; doi:10.1371/journal.pone.0122231), 2015-03-25
Supplement: pone.0122231.s003.pdf [file pone.0122231.s003.pdf]

# A modular analysis of the auxin signalling network

## Supplementary Figures: Alternative Models of Auxin Induced IAA Degradation

E. Farcot, C. Lavedrine, T. Vernoux

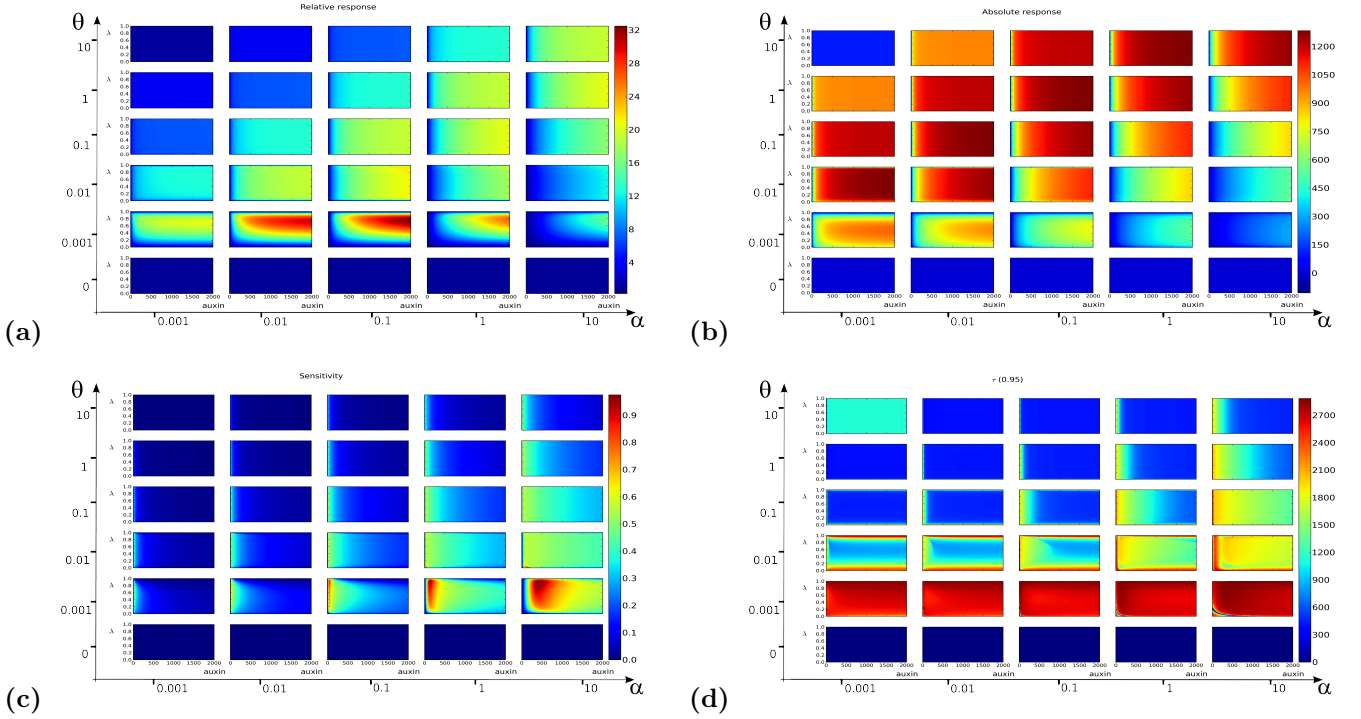

**Figure 1. Model (M1). Output landscapes as functions of auxin level  $x$  (abscissae) and balance between the two core mechanisms, parametrized by  $\lambda$  (ordinates). (a) Relative response  $\rho_{rel}(x, \lambda)$ . (b) Absolute response  $\rho_{abs}(x, \lambda)$ . (c) Sensitivity  $\sigma(x, \lambda)$ . (d) Response time  $\tau(x, \lambda)$ . For each landscape  $(x, \lambda)$  span a  $200 \times 200$  regular grid on the rectangle  $[0, 2000] \times [0, 1]$ .**

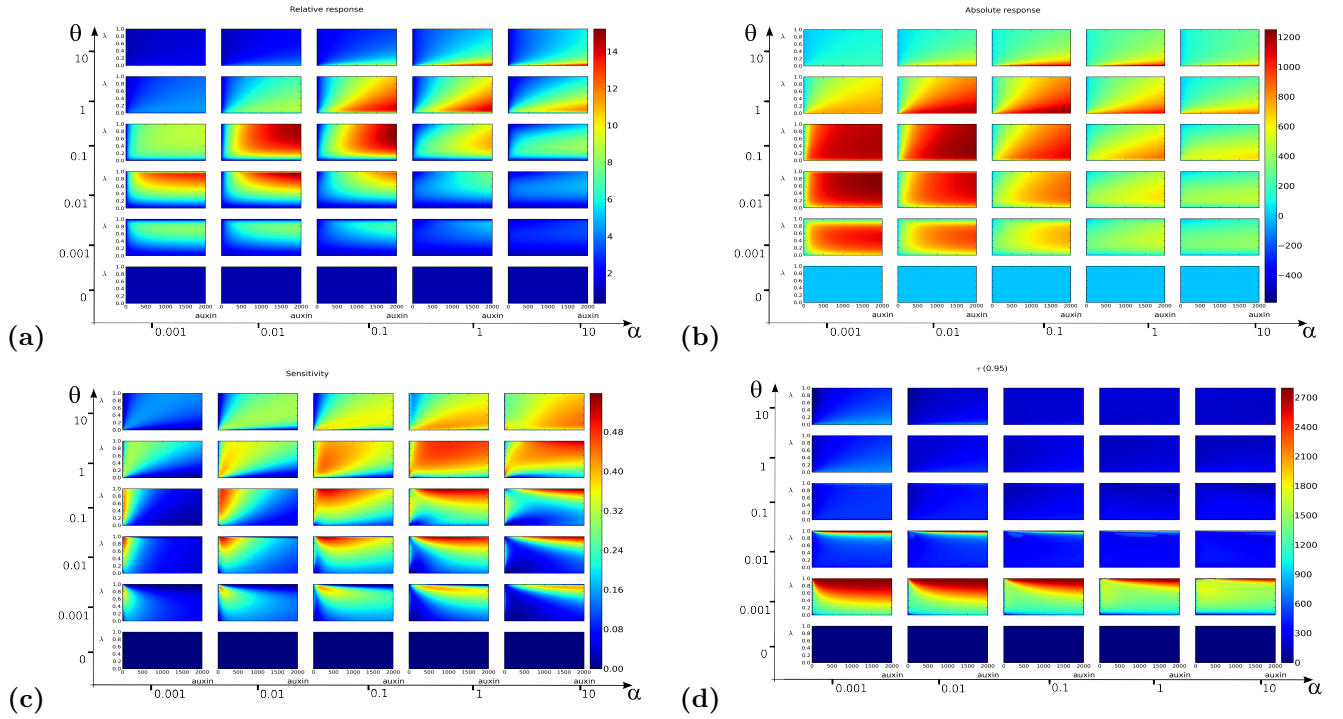

**Figure 2. Model (M2). Output landscapes as functions of auxin level  $x$  (abscissae) and balance between the two core mechanisms, parametrized by  $\lambda$  (ordinates). (a) Relative response  $\rho_{rel}(x, \lambda)$ . (b) Absolute response  $\rho_{abs}(x, \lambda)$ . (c) Sensitivity  $\sigma(x, \lambda)$ . (d) Response time  $\tau(x, \lambda)$ . For each landscape  $(x, \lambda)$  span a  $200 \times 200$  regular grid on the rectangle  $[0, 2000] \times [0, 1]$ .**
